# Supplementary material
Source: MDPI journal article supplement (https://www.mdpi.com/2073-4352/12/2/300)
Supplement: s1 [file s1]

# Supplementary Materials: A Solid-Solid Phase Transformation of Triclabendazole at High Pressures

Imran Ali <sup>1,2</sup>, Jiequn Tang <sup>2</sup>, Yanqiang Han <sup>2</sup>, Zhiyun Wei <sup>1,\*</sup>, Yongli Zhang <sup>1,\*</sup> and Jinjin Li <sup>1,2,\*</sup>

**Table S1.** The calculated and experimental [1] crystal structures of triclabendazole forms I and II at different pressures.

| P (GPa)        | a/Å    | b/Å    | TCBZ Form I |       |        |       | V/Å <sup>3</sup> |
|----------------|--------|--------|-------------|-------|--------|-------|------------------|
|                |        |        | c/Å         | α°    | β°     | γ°    |                  |
| atm (Exp. [1]) | 9.658  | 10.183 | 17.775      | 81.75 | 75.63  | 62.34 | 1499.087         |
| atm (Cal.)     | 9.632  | 10.184 | 17.694      | 81.75 | 75.63  | 62.34 | 1488.381         |
| 1              | 9.383  | 10.009 | 17.467      | 81.75 | 75.63  | 62.34 | 1406.773         |
| 5              | 8.898  | 9.647  | 16.692      | 81.75 | 75.63  | 62.34 | 1228.731         |
| 5.5            | 8.866  | 9.606  | 16.646      | 81.75 | 75.63  | 62.34 | 1215.607         |
| 6              | 8.833  | 9.569  | 16.604      | 81.75 | 75.63  | 62.34 | 1203.488         |
| 7              | 8.770  | 9.499  | 16.527      | 81.75 | 75.63  | 62.34 | 1180.769         |
| 11             | 8.577  | 9.281  | 16.271      | 81.75 | 75.63  | 62.34 | 1110.72          |
| TCBZ Form II   |        |        |             |       |        |       |                  |
| atm (Exp. [1]) | 21.277 | 8.8962 | 16.447      | 90    | 112.69 | 90    | 1436.111         |
| atm (Cal.)     | 21.282 | 8.891  | 16.725      | 90    | 112.69 | 90    | 1459.874         |
| 1              | 20.966 | 8.606  | 16.389      | 90    | 112.69 | 90    | 1364.130         |
| 5              | 20.335 | 8.102  | 15.705      | 90    | 112.69 | 90    | 1193.605         |
| 5.5            | 20.285 | 8.051  | 15.682      | 90    | 112.69 | 90    | 1181.443         |
| 6              | 20.235 | 8.006  | 15.648      | 90    | 112.69 | 90    | 1169.402         |
| 7              | 20.145 | 7.920  | 15.606      | 90    | 112.69 | 90    | 1148.604         |
| 11             | 19.880 | 7.657  | 15.369      | 90    | 112.69 | 90    | 1079.213         |

Table S1 shows the experimental [1] and calculated crystal structure parameters of TCBZ forms I and II at different pressures. We found phase transition at pressure of 5.5 GPa which is highlighted in Table S1. The comparison of experimental and calculated crystal structures for both forms of TCBZ are given in Figures S1 and S2. Where Figure S1 provides crystal structures for TCBZ form I at atmospheric pressure and high pressures. Figure S2 provides crystal structures for TCBZ form II at atmospheric pressure and high pressures.

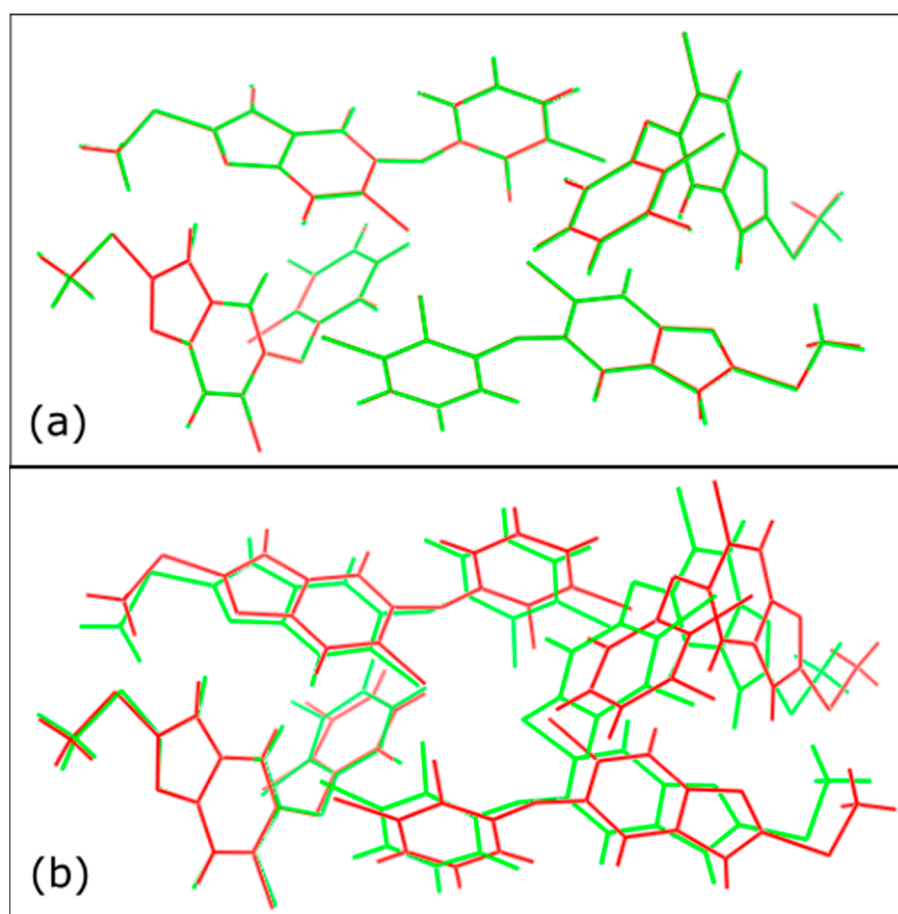

**Figure S1.** Experimental [1] (red) and calculated (green) crystal structures of TCBZ form I. **(a)** shows overlay of experimental [1] and predicted crystal structures at atmospheric pressure. **(b)** shows over-lay of experimental [1] at atmospheric pressure and computed structure at 5.5 GPa.

The comparison between experimental [1] (Red) and calculated (Green) crystal structure of TCBZ form I is given in Figure S1a, where both structures were found at room temperature and atmospheric pressure. The root mean square deviation (RMSD) was found to be 0.081 (Å), which is evidence of both structures matches well. However, RMSD for overlay of experimental form I at atmospheric pressure to calculated form I at high pressure (5.5 GPa) was found to be 0.436 (Å), which is evidence of change in crystal structure, can be seen in Figure S1 b.

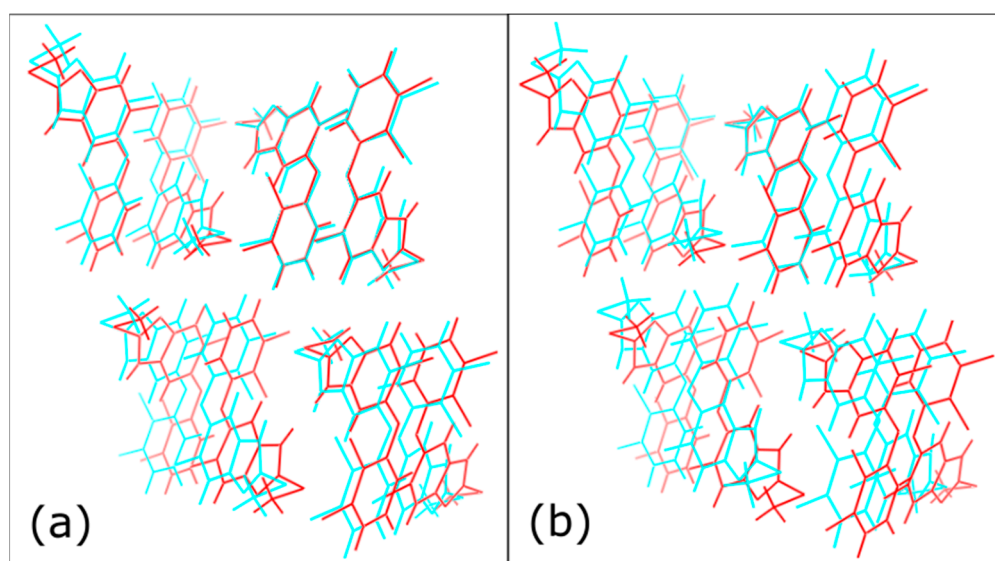

**Figure S2.** Experimental [1] (red) and calculated (cyan) crystal structures of TCBZ form II. (a) shows overlay of experimental [1] and predicted crystal structures at atmospheric pressure. (b) shows over-lay of experimental [1] at atmospheric pressure and computed structure at 5.5 GPa.

The comparison between experimental [1] (Red) and calculated (Green) crystal structure of TCBZ form II is given in Figure S2a, where both structures were found at room temperature and atmospheric pressure. The root mean square deviation (RMSD) was found to be 0.262 (Å), which shows less accuracy in prediction of crystal structure of form II. Moreover, RMSD for overlay of experimental form II at atmospheric pressure to calculated form II at high pressure (5.5 GPa) was found to be 0.626 (Å), which is an evidence of change in crystal structure, can be seen in Figure S2 b.

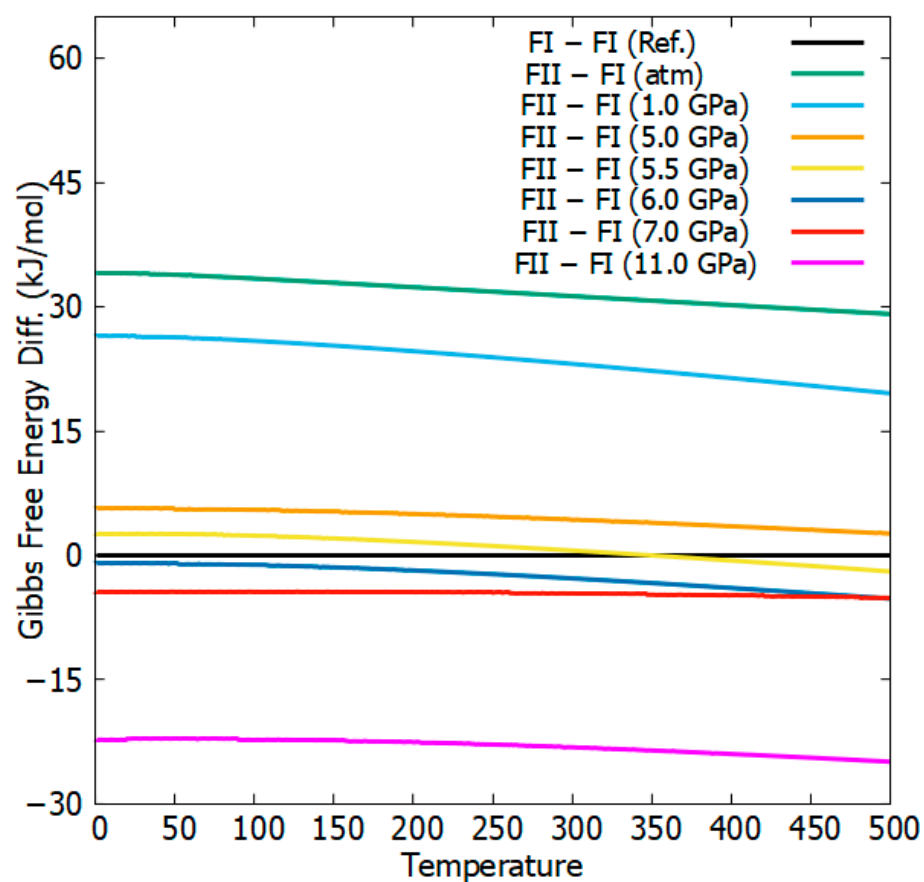

**Figure S3.** Calculated Gibbs free energy differences between TCBZ forms I and II at different pressures with respect to temperatures from 0 K to 500 K.

## Reference

1. Tothadi, S.; Bhogala, B.R.; Gorantla, A.R.; Thakur, T.S.; Jetti, R.K.R.; Desiraju, G.R. Triclabendazole: An Intriguing Case of Co-Existence of Conformational and Tautomeric Polymorphism. *Chem. Asian J.* **2012**, *7* (2), 330–342, <https://doi.org/10.1002/asia.201100638>.
